# Supplementary material for: Effects of konjac glucomannan intake patterns on glucose and lipid metabolism of obese mice induced by a high fat diet
Source: Royal Society of Chemistry journal article supplement (doi:10.1039/d4fo02442g), 2024-01-01
Supplement: d4fo02442g1.pdf [file d4fo02442g1.pdf]

**Effects of konjac glucomannan intake patterns on glucose and lipid metabolism  
of obese mice induced by high fat diet**

Sijia Zhu <sup>a,b</sup>, Jiyu Yang <sup>a,b</sup>, Pengkui Xia <sup>a,b</sup>, Sha Li <sup>a,b</sup>, Qi Wang <sup>a,b</sup>, Kaikai Li <sup>a,b</sup>, Bin Li <sup>a,b</sup>, Jing  
Li <sup>a,b,\*</sup>

<sup>a</sup> College of Food Science and Technology, Huazhong Agricultural University, Wuhan 430070,  
China

<sup>b</sup> Key Laboratory of Environment Correlative Dietology, Huazhong Agricultural University,  
Ministry of Education, China

\* Corresponding author: Jing Li

E-mail: [lijingfood@mail.hzau.edu.cn](mailto:lijingfood@mail.hzau.edu.cn)

**Table S1 Diet formula and energy**

| Material                | D12450J (10 kcal% Fat) |        | D12492 (60 kcal% Fat) |       |
|-------------------------|------------------------|--------|-----------------------|-------|
|                         | gm                     | kcal   | gm                    | kcal  |
| Casein                  | 200                    | 800    | 200                   | 800   |
| L-Cystine               | 3                      | 12     | 3                     | 12    |
| Corn Starch             | 506.2                  | 2024.8 | 0                     | 0     |
| Maltodextrin 10         | 125                    | 500    | 125                   | 500   |
| Sucrose                 | 68.8                   | 275.2  | 68.8                  | 275.2 |
| Cellulose,BW200         | 50                     | 0      | 50                    | 0     |
| Soybean Oil             | 25                     | 225    | 25                    | 225   |
| Lard                    | 20                     | 180    | 245                   | 2205  |
| Mneral Mx S10026        | 10                     | 0      | 10                    | 0     |
| DiCalcium Phosphate     | 13                     | 0      | 13                    | 0     |
| Calcium Carbonate       | 5.5                    | 0      | 5.5                   | 0     |
| Potassium Citrate,1 H2O | 16.5                   | 0      | 16.5                  | 0     |
| Vitamin Mx V10001       | 10                     | 40     | 10                    | 40    |
| Choline Bitartrate      | 2                      | 0      | 2                     | 0     |
| FD&C Yellow Dye#5       | 0.04                   | 0      | 0                     | 0     |
| FD&C Blue Dye#1         | 0.01                   | 0      | 0.05                  | 0     |
|                         | gm %                   | kcal%  | gm%                   | kcal% |
| Protein                 | 19.2                   | 20     | 26.2                  | 20    |
| Carbohydrate            | 67.3                   | 70.0   | 26.3                  | 20.1  |
| Fat                     | 4.3                    | 10     | 34.9                  | 59.9  |
| Total                   |                        | 100    |                       | 100   |
| Total                   | 1055.05                | 4057   | 773.85                | 4057  |

**Table S2 Primer information of genes to be tested**

| Item                            |           | Base sequence (5'-3')    |
|---------------------------------|-----------|--------------------------|
| <i>GCK</i>                      | sense     | CCCAGTCGTTGACTCTGGTAG    |
|                                 | antisense | CCACGGTCCATCTCCTTCTG     |
| <i>GSK-3<math>\beta</math></i>  | sense     | GCTGTGTGTTGGCTGAATTGT    |
|                                 | antisense | TGCTCCTGGTGAGTCCTTTGT    |
| <i>Glut4</i>                    | sense     | GGCTCTGACGTAAGGATGGG     |
|                                 | antisense | GCCACGTTGCATTGTAGCTC     |
| <i>G-6-pase</i>                 | sense     | TGAGACCGGACCAGGAAGTC     |
|                                 | antisense | GCAAGGTAGATCCGGGACAG     |
| <i>PEPCK</i>                    | sense     | GGGTGGAAGGTCGAATGTGT     |
|                                 | antisense | AGCCCTTAAGTTGCCTTGGG     |
| <i>LDLR</i>                     | sense     | ACAGGTGTGAAGATATTGACGAGT |
|                                 | antisense | CGGTTGGTGAAGAGCAGATAGC   |
| <i>SR-B1</i>                    | sense     | CCTCTGTCTCCGTCTCCTTC     |
|                                 | antisense | TCTATGCGGACATTCTTGAGCA   |
| <i>CYP7A1</i>                   | sense     | ACACTACTTCTGCGAAGGCAT    |
|                                 | antisense | CCCGGAGGTCTCATGACAGA     |
| <i>FXR</i>                      | sense     | TGAGGGCTGCAAAGGTTTCT     |
|                                 | antisense | ACCTGTATACATACATTCAGCCAA |
| <i>PPAR<math>\alpha</math></i>  | sense     | TGCCTTCCCTGTGAACTGAC     |
|                                 | antisense | CACAGAGCGCTAAGCTGTGA     |
| <i><math>\beta</math>-actin</i> | sense     | CACTGTCGAGTCGCGTCC       |
|                                 | antisense | TCATCCATGGCGAACTGGTG     |

**Table S3 Linear regression equation and precision of SCFA standards**

| SCFA       | Retention  | Regression equation | Linear range ( $\mu\text{mol/mL}$ ) | Repeatability |         |
|------------|------------|---------------------|-------------------------------------|---------------|---------|
|            | Time (min) |                     |                                     | R             | RSD (%) |
| Acetic     | 5.45       | $y=9.8424x-520.62$  | 78.125~5000                         | 0.9975        | 5.44    |
| Propionic  | 6.55       | $y=21.808x-1072$    | 78.125~5000                         | 0.9992        | 4.72    |
| Isobutyric | 6.91       | $y=29.927x-1217$    | 78.125~5000                         | 0.9975        | 5.65    |
| Butyric    | 7.73       | $y=33.669x-1534.5$  | 78.125~5000                         | 0.9975        | 5.51    |
| Isovaleric | 8.23       | $y=46.841x-1962.9$  | 78.125~5000                         | 0.9980        | 7.59    |
| Valeric    | 9.13       | $y=47.235x-2236.8$  | 78.125~5000                         | 0.9980        | 7.62    |

**Table S4 Effects of different treatments on body weight of mice.**

| Wee<br>k | C                       | HF                      | KS                       | DK                       | KG                       | FKG                      |
|----------|-------------------------|-------------------------|--------------------------|--------------------------|--------------------------|--------------------------|
| 0        | 19.67±1.07 <sup>a</sup> | 19.63±0.99 <sup>a</sup> | 19.63±0.90 <sup>a</sup>  | 19.63±0.78 <sup>a</sup>  | 19.64±0.72 <sup>a</sup>  | 19.63±0.64 <sup>a</sup>  |
| 1        | 20.88±0.77 <sup>a</sup> | 21.81±1.13 <sup>a</sup> | 21.13±0.63 <sup>a</sup>  | 21.25±1.26 <sup>a</sup>  | 20.68±0.48 <sup>a</sup>  | 21.35±0.98 <sup>a</sup>  |
| 2        | 22.02±0.83 <sup>a</sup> | 22.89±1.39 <sup>a</sup> | 21.76±0.70 <sup>a</sup>  | 22.17±1.26 <sup>a</sup>  | 21.78±0.40 <sup>a</sup>  | 22.16±1.45 <sup>a</sup>  |
| 3        | 22.66±1.04 <sup>a</sup> | 23.91±1.53 <sup>a</sup> | 22.69±0.93 <sup>a</sup>  | 23.22±1.27 <sup>a</sup>  | 23.19±0.79 <sup>a</sup>  | 23.11±1.49 <sup>a</sup>  |
| 4        | 23.69±1.17 <sup>a</sup> | 25.06±1.63 <sup>a</sup> | 23.68±0.98 <sup>a</sup>  | 23.95±1.18 <sup>a</sup>  | 24.22±0.87 <sup>a</sup>  | 24.12±1.69 <sup>a</sup>  |
| 5        | 25.12±1.40 <sup>a</sup> | 26.46±1.81 <sup>b</sup> | 24.80±1.11 <sup>a</sup>  | 25.27±1.42 <sup>ab</sup> | 25.30±1.11 <sup>ab</sup> | 25.05±1.69 <sup>ab</sup> |
| 6        | 25.53±1.45 <sup>a</sup> | 27.68±1.80 <sup>b</sup> | 25.70±1.12 <sup>a</sup>  | 25.82±1.23 <sup>ab</sup> | 25.85±1.15 <sup>ab</sup> | 25.54±1.90 <sup>ab</sup> |
| 7        | 25.44±1.30 <sup>a</sup> | 28.75±2.08 <sup>b</sup> | 26.43±1.33 <sup>ab</sup> | 26.97±1.34 <sup>ab</sup> | 26.8±1.45 <sup>ab</sup>  | 26.22±2.06 <sup>ab</sup> |
| 8        | 25.77±1.30 <sup>a</sup> | 29.68±2.10 <sup>b</sup> | 26.78±1.40 <sup>a</sup>  | 27.53±1.12 <sup>ab</sup> | 27.22±1.82 <sup>ab</sup> | 26.63±2.40 <sup>ab</sup> |
| 9        | 26.17±1.32 <sup>a</sup> | 30.66±1.87 <sup>b</sup> | 27.23±1.40 <sup>a</sup>  | 28.26±1.24 <sup>a</sup>  | 28.16±1.85 <sup>a</sup>  | 27.25±2.36 <sup>a</sup>  |
| 10       | 26.26±1.36 <sup>a</sup> | 31.53±2.24 <sup>b</sup> | 27.72±1.36 <sup>a</sup>  | 28.79±1.36 <sup>a</sup>  | 28.84±1.81 <sup>a</sup>  | 27.66±2.29 <sup>a</sup>  |
| 11       | 26.00±1.21 <sup>a</sup> | 32.00±2.31 <sup>c</sup> | 28.29±1.36 <sup>ab</sup> | 29.64±1.44 <sup>ab</sup> | 29.50±2.11 <sup>ab</sup> | 28.08±2.79 <sup>ab</sup> |
| 12       | 26.25±1.15 <sup>a</sup> | 32.84±1.63 <sup>c</sup> | 28.96±1.00 <sup>b</sup>  | 29.86±1.89 <sup>b</sup>  | 29.86±1.39 <sup>b</sup>  | 28.30±1.73 <sup>ab</sup> |

**Note: Different lowercase letters in the same line indicated a statistically significant difference between groups ( $P < 0.05$ ).**

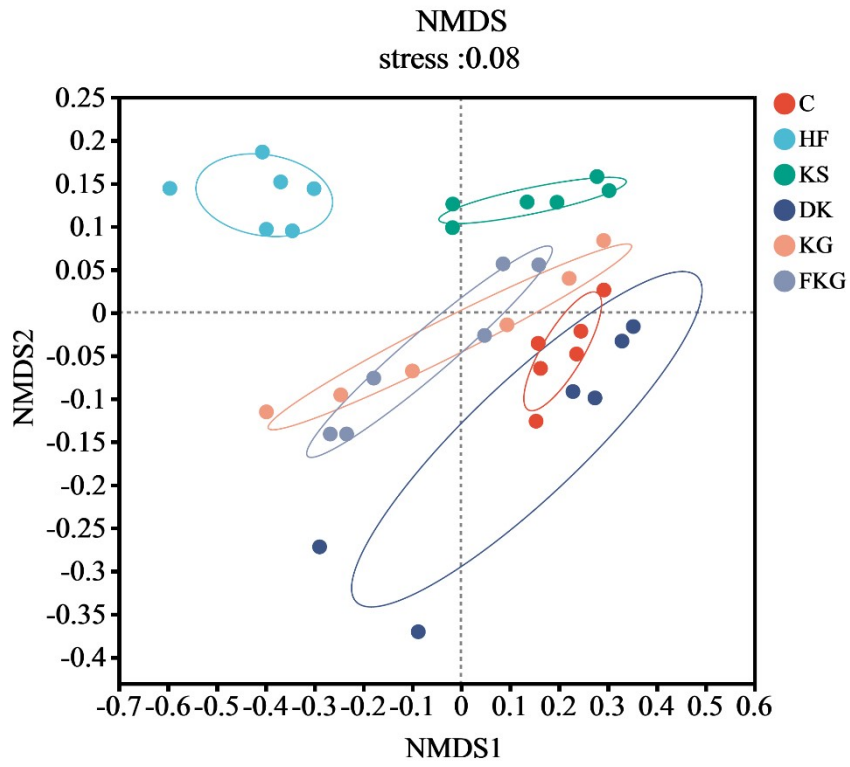

Fig.S1 NMDS analysis of  $\beta$  diversity index of mouse intestinal flora
